# Supplementary material
Source: Elsevier journal article supplement (https://www.sciencedirect.com/science/article/pii/S1699258X20302722)
Supplement: mmc1 [file S1699258X20302722:mmc1.pdf]

## DESINFECTANTES Y PROCEDIMIENTO DE DESINFECCIÓN DEL EQUIPAMIENTO ECOGRÁFICO EN PANDEMIA COVID19.

### 1. Principios generales:

- A efectos de desinfección todos los pacientes deben considerarse en riesgo de transmisión de COVID-19.
- La sonda, preferiblemente cubierta con un cobertor o guante durante la exploración, debe limpiarse primero de restos visibles de gel o suciedad y posteriormente desinfectarse con un desinfectante adecuado tras cada paciente.
- Todo el proceso de desinfección debe realizarse con el equipo de protección adecuado (EPI) para evitar salpicaduras de gel y contacto con elementos contaminados.
- Debe utilizarse un desinfectante que se haya demostrado eficaz y el menos agresivo de los disponibles.
- No se recomienda el uso de productos para los cuales se requiera un tiempo de contacto de más de 5 minutos, ya que sería difícil de aplicar en modo de rociado o limpieza directa e inviable para el uso repetido entre pacientes
- Los productos recomendados por los fabricantes para la limpieza de los equipos ecográficos, suelen tener en su composición amonios cuaternarios. Estos son los más apropiados para una limpieza respetuosa con el equipo ecográfico siempre que no sea necesario una limpieza de alta intensidad.
- Grado de limpieza previo: La mayor parte de desinfectantes se inactivan en presencia de materia orgánica, especialmente si la carga de materia orgánica es elevada y/o si se encuentra desecada. Las características del material y las superficies también pueden afectar la calidad de la limpieza de modo que materiales plásticos/gomas, superficies porosas/ rugosas/con relieves predisponen a una peor limpieza.

### 2. Elementos siempre a desinfectar en una exploración ecográfica y desinfectante de elección:

2.1 SONDA. Transductor. Preferible compuestos de amonio cuaternario.

2.2 CABLE O CORDON. Preferible compuestos de amonio cuaternario.

2.3 TECLADO DURO: Se puede limpiar con alcohol, hipoclorito sódico o compuestos de amonio cuaternario.

2.4 BOTONES: La botonadura del ecógrafo puede ser de plástico duro, goma o silicona, la limpieza óptima varía según la composición. Preferible compuestos de amonio cuaternario.

2.5 PANTALLA: Con gamuza microfibra suave. Puede utilizarse preferiblemente compuestos de amonio cuaternario o alcohol.

2.6 CAMILLA. Solución de hipoclorito sódico o alcohol.

### 3. Desinfectantes de bajo nivel habitualmente utilizados para la limpieza en el procedimiento ecográfico. Principios activos e indicaciones.

**Tabla 1. DESINFECTANTES DE BAJO NIVEL (LLD)**

| Principio Activo             | AMONIO CUATERNARIO (1)                  | HIPOCLORITO SODICO 0,1-0,2% (2) | ALCOHOL 70% (3)                  | SOL.HIDRO ALCOHOLICA (4) |
|------------------------------|-----------------------------------------|---------------------------------|----------------------------------|--------------------------|
| Tiempo de contacto           | 5 minutos (SIN asociación de alcoholes) | 1-5 minutos                     | 1 min                            | 30 segundos              |
| CABEZAL TRANSDUCTOR          | SI                                      | P aclarar después               | NO/ P* (<100 c), aclarar después | NO                       |
| CABLE/CORDON                 | SI                                      | P aclarar después               | P, aclarar después               | NO                       |
| BOTONES (goma, silicona)     | SI                                      | P aclarar después               | P, aclarar después               | NO                       |
| TECLADO PLASTICO DURO        | SI                                      | SI                              | SI                               | NO                       |
| PANTALLA (gamuza microfibra) | SI                                      | SI                              | SI                               | NO                       |
| CAMILLA                      | NO                                      | SI                              | SI                               | NO                       |
| PIEL Paciente/Profes         | NO                                      | NO                              | SI                               | SI                       |

Tabla1. Desinfectantes de bajo nivel utilizados en la limpieza del equipamiento ecográfico y piel.

Abreviaturas: LLD: Low level desinfectants. Eficaces para inactivar los virus (atacan la cubierta lipídica). Útiles en caso de procedimientos con materiales no críticos (contacto únicamente con piel intacta). No adecuados si hay contacto con mucosas o piel dañada.

SI= Producto apropiado, óptimo.

P= Posible con precauciones, puede producir deterioro. Aconsejable aclarar con agua destilada (para inyección) después.

NO P\*=. No se recomienda, pero se podría usar puntualmente en caso de no disponer de otro producto. Daña la silicona del cabezal. Máximo 1 minuto, máximo 100 ciclos o aplicaciones, aclarar con agua destilada después.

NO= No indicado, no debe utilizarse.

(1) Amonios cuaternarios. Formulaciones con combinaciones variables de amonios cuaternarios de cuarta generación (DDAC: cloruro de didecil dimetil amonio - cloruro de alquil dimetil amonio ) o de quinta generación (DDAC+ ADBAC ). ADBAC: cloruro de alquil-dimetil-bencil amonio. La concentración es variable 0,5-7%, habitualmente 4%. Baja corrosividad, poder residual (sin aclarado). No deterioran gomas ni siliconas.

En algunos productos se especifica actividad contra coronavirus, en otros no. Pueden llevar asociados otros productos en combinación: glutaraldehído, biguanidas, cloruro de benzalconio, alcoholes /propanol. Elegir de preferencia los que no lleven alcoholes en su composición.

(2) *Hipoclorito de sodio (lejía común) a concentración 0,1-0,2%, 1-5 minutos máximo (más eficaz 0,2% 5 minutos) dejando que seque. Aclarar después con agua destilada. Expuesto al aire es volátil, por lo tanto, se recomienda preparar lo estrictamente necesario y cambiarlo al menos cada 8 horas. Potencialmente agresivo para plásticos (especialmente blandos) y siliconas porosas, a baja concentración con aclarado posterior se minimiza ese efecto.*

(3) *Alcohol etílico o isopropílico al 70%. No adecuado para el cabezal de la sonda, aunque puntualmente se puede utilizar durante máximo 1 minuto, si no hay otro producto apropiado (máximo 100 ciclos de limpieza). Dejar que seque y aclarar luego con agua destilada. Potencialmente agresivo, deterioro de gomas y siliconas.*

*Explor: Explorador ecográfico*

(4) *Soluciones hidroalcohólicas habitualmente a base de Propan-1 ol y/o propan-2 ol. Adecuadas para la higiene de manos y área a explorar. Pueden tener asociaciones con Etilsulfato de mecetronio 0,2% (ej. Sterilium®). Pueden llevar glicerinas para hidratar la piel.*

**4. Formas comerciales de desinfectantes basados en amonio cuaternario:** Algunas formas comerciales de desinfectantes basados en amonios cuaternarios recomendados, disponibles en nuestros hospitales, comercializados en Europa.

- *Instrunet. Wip Anios Excel wipes®.* Cloruro de didecildimetilamonio ( 3mg/g), tensioactivos no iónicos, agentes secuestrantes, excipientes.

- *Instrunet. Surfa safe Premium®. Anios laboratorio. Spray.* Cloruro de didecilmetilamonio, tensioactivos catiónico y anfóteros, secuestrante y excipientes. En general se recomienda tiempo de exposición en 5 min 20° frente a coronavirus.

- *Clinell Universal spray® y Toallitas Clinell Universal version®* Cloruro de Benzalconio 0.45 % Cloruro de didecil dimetil amonio 0.40 % Polihexametilenbiguanida (PHMB) < 0.1%

- *Mikrobact Tissues®. Lab. Hartmann- Toallitas.* Cloruro de didecil dimetil amonio (DDAC) 4 mg/g, cloruro de bencil alquil dimetil amonio (ADBAC) 4 mg/g , sin aldehídos ni alcohol. No aptas para manos. No especifica coronavirus, para otros virus 1 minuto.

- *COMPROBAR COMPOSICION, HAY PRODUCTOS CON NOMBRE PARECIDO Y CON ELEMENTOS ASOCIADOS NO ADECUADOS. EJEMPLO: Instrunet Aniosp ray Quick®: Solución hidroalcohólica (etanol 55%, propionato de amonio cuaternario, perfume).*

## **5. Productos no recomendados.**

- Ácido peracético. Sustancia agresiva, en general no se recomienda el uso de todos los productos basados en este principio activo.

- Glutaraldehído. Uso no recomendado debido a la alta toxicidad.

- Peróxido de hidrógeno (peróxido de hidrógeno). Los tiempos de contacto y la concentración necesarios sugieren no usarlo.

- Clorhexidina. Menor eficacia.

- Cloruro de benzalconio. Baja eficacia.

- Formaldehído. Toxicidad.

- Ácido Láctico. Baja eficacia.

## **6. Limpieza De Alta Intensidad: (Ecografos Para Intervencionismo):** Contacto con fluidos contaminados, mucosas o piel no sana. Uso poco habitual en reumatología.

Tres fases: limpieza con detergente enzimático, desinfección de alto nivel y aclarado final con agua libre de microorganismos. Existen en el mercado reprocesadores automáticos que permiten preservar la parte no sumergible, pero debido a que su uso está poco generalizado, el tratamiento se puede realizar de modo manual. El desinfectante de alto nivel puede aplicarse con paño o toallita de un solo uso o bien por inmersión. Se utilizan productos más agresivos o los de bajo nivel a mayor concentración y tiempo.

### **Bibliografía**

1. Abramowicz JS. World Federation for Ultrasound in Medicine and Biology Safety Committee (Jacques S. World Federation for Ultrasound in Medicine and Biology Position Statement: How to Perform a Safe Ultrasound Examination and Clean Equipment in the Context of COVID-19. *Ultrasound Med Biol.* 4 de abril de 2020;
2. Kampf G, Todt D, Pfaender S, Steinmann E. Persistence of coronaviruses on inanimate surfaces and their inactivation with biocidal agents. *J Hosp Infect.* marzo de 2020;104(3):246-51.
3. Henwood AF. Coronavirus disinfection in histopathology. *J Histotechnol.* 1 de marzo de 2020;1-3.
4. Coronavirus Disease 2019 (COVID-19) Cleaning and Disinfection for Households, United States CDC (Centers for Disease Control and Prevention)
5. Productos virucidas autorizados en España. Ministerio de Sanidad. SECRETARIA GENERAL DE SANIDAD. DIRECCIÓN GENERAL DE SALUD PÚBLICA, CALIDAD E INNOVACIÓN SUBDIRECCIÓN GENERAL DE SANIDAD AMBIENTAL Y SALUD LABORAL. Última actualización: 08/06/2020.  
[https://www.mscbs.gob.es/profesionales/saludPublica/ccayes/alertasActual/nCov-China/documentos/Listado\\_virucidas.pdf](https://www.mscbs.gob.es/profesionales/saludPublica/ccayes/alertasActual/nCov-China/documentos/Listado_virucidas.pdf)

### **Recomendaciones y manuales de limpieza de fabricantes de ecógrafos**

<https://www.esaote.com/special-covid-19/our-solutions/esaote-ultrasound-probes-cleaning-and-disinfection-in-the-event-of-covid-19-emergency>

<https://www.samsunghealthcare.com/en/products/UltrasoundSystem>

<https://www.gehealthcare.com/products/ultrasound/ultrasound-transducers>

<https://www.philips.com/c-dam/b2bhc/master/whitepapers/ultrasound-care-and-cleaning/care-and-cleaning-manuals/CC-US.pdf>
